# Supplementary figures and images for: Poly(Glycerol) Microparticles as Drug Delivery Vehicle for Biomedical Use
Source: MDPI journal article supplement (doi:10.3390/pharmaceutics15020384), 2023-01-23

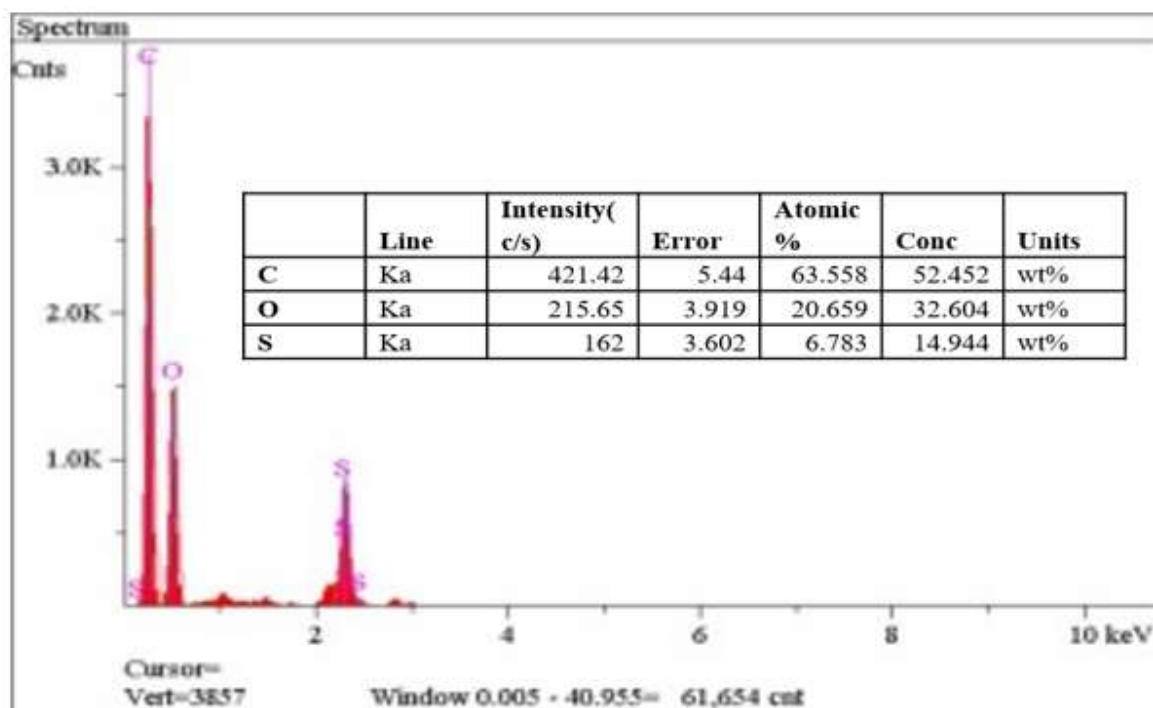

**Figure S1.** Energy-dispersive X-ray spectroscopy analysis of p(Gly) particles.

Supplement: s1 [file s1]
